# Supplementary material
Source: PubMed Central journal article supplement (PMC3529128)
Supplement: NIHMS315374-supplement-01.pdf [file NIHMS315374-supplement-01.pdf]

Type of file: table

Label: 1

Filename: 315374\_Table1.doc

**Supplementary Table 1. Ophthalmologic complications in patients with cbIC disease**

| PATIENT No.        | Classification | Age diagnosis (years) | Age findings (years) | Normal Exam | Visual inattention | Nystagmus | Normal fundus | Maculopathy      | Optic nerve     | Retinopathy | ERG       | Other                    | Visual acuity OD (logMAR) | Visual acuity OS (logMAR) | Reference    | Genotype                    |
|--------------------|----------------|-----------------------|----------------------|-------------|--------------------|-----------|---------------|------------------|-----------------|-------------|-----------|--------------------------|---------------------------|---------------------------|--------------|-----------------------------|
| <b>EARLY-ONSET</b> |                |                       |                      |             |                    |           |               |                  |                 |             |           |                          |                           |                           |              |                             |
| 1                  | 2              | 0.1                   | 0.1                  |             |                    |           |               | Pigment mottling |                 |             |           |                          |                           |                           | Traboulsi    |                             |
| 2                  | 1              | 0.1                   | 0.1                  | *           |                    |           | *             |                  |                 |             |           |                          |                           |                           | Schimel      |                             |
| 3                  | 1              | 0.1                   | 0.1                  | *           |                    |           | *             |                  |                 |             |           |                          |                           |                           | Gerth        | c.547_548delGT/547_548delGT |
| 4                  | 2              | 0.1                   | 0.1                  |             |                    |           |               | Pigment mottling |                 |             |           |                          |                           |                           | Geraghty     | c.271dupA/271dupA           |
| 5                  | 2              | 0.1                   | 0.1                  |             |                    |           |               | Pigment mottling |                 |             |           |                          |                           |                           | Kind         |                             |
| 6                  | 1              | 0.1                   | 0.1                  | *           |                    |           | *             |                  |                 |             |           |                          |                           |                           | DeBie        | c.271dupA/271dupA           |
| 7                  | 1              | 0.1                   | 0.1                  | *           |                    |           | *             |                  |                 |             |           |                          |                           |                           | Mitchell     | c.331C>T/271dupA            |
| 1                  | 3              | 0.1                   | 0.2                  |             | *                  | *         |               |                  |                 |             | Decreased |                          |                           |                           | Traboulsi    |                             |
| 8                  | 1              | 0.2                   | 0.2                  | *           |                    |           | *             |                  |                 |             |           |                          |                           |                           | Mamlok       |                             |
| 9                  | 2              | 0.1                   | 0.2                  |             | *                  |           |               | Pigment mottling |                 |             | Normal    |                          |                           |                           | Mitchell     | c.331C>T/271dupA            |
| 10                 | 3              | 0.2                   | 0.2                  |             | *                  |           |               | Pigment mottling | Pallor          |             | 30*/37**  |                          |                           |                           | Bartholomew  | c.271dupA/271dupA           |
| 11                 | 2              | 0.2                   | 0.2                  |             |                    |           |               | Pigment mottling |                 |             |           |                          |                           |                           | Bartholomew  | c.271dupA/271dupA           |
| 12                 | 3              | 0.3                   | 0.3                  |             | *                  |           |               |                  |                 |             |           | Roving eye movement      |                           |                           | Beauchamp    |                             |
| 13                 | 1              | 0.1                   | 0.3                  | *           |                    |           | *             |                  |                 |             |           |                          |                           |                           | Gerth        | c.331C>T/666C>A             |
| 14                 | 2              | 0.3                   | 0.3                  |             | *                  |           |               | Pigment mottling |                 | RP          |           |                          |                           |                           | Brandstetter | c.331C>T/271dupA            |
| 6                  | 3              | 0.1                   | 0.4                  |             |                    |           | *             |                  |                 |             | Decreased |                          |                           |                           | DeBie        | c.271dupA/271dupA           |
| 1                  | 3              | 0.1                   | 0.5                  |             |                    |           |               | BEM              | Temporal pallor |             |           | Narrowed retinal vessels |                           |                           | Traboulsi    |                             |
| 1                  | 2              | P                     | 0.                   |             |                    |           |               |                  | Slight          |             |           |                          |                           |                           | Patton       |                             |

|   |   |     |     |   |   |   |   |                     |               |                  |  |  |                         |             |                             |  |  |
|---|---|-----|-----|---|---|---|---|---------------------|---------------|------------------|--|--|-------------------------|-------------|-----------------------------|--|--|
| 5 |   |     | 5   |   |   |   |   | pallor              |               |                  |  |  |                         |             |                             |  |  |
| 2 | 2 | 0.1 | 0.5 |   |   |   |   | Mild pallor         |               | Decreased        |  |  |                         | Schimel     |                             |  |  |
| 1 | 2 | 0.1 | 0.5 | * |   |   |   |                     |               | Decreased        |  |  |                         | Schimel     |                             |  |  |
| 6 | 2 | 0.1 | 0.5 |   | * |   | * |                     |               | Normal           |  |  |                         | Kind        |                             |  |  |
| 5 | 2 | 0.1 | 0.5 |   |   |   |   |                     |               |                  |  |  |                         |             |                             |  |  |
| 6 | 3 | 0.1 | 0.5 |   |   |   |   |                     | RP            |                  |  |  |                         | DeBie       | c.271dupA/271dupA           |  |  |
| 1 | 2 | 0.6 | 0.6 |   | * | * | * |                     |               |                  |  |  |                         | Frattini    | c.271dupA/616C>T            |  |  |
| 1 | 3 | 0.1 | 0.6 |   |   |   |   | BEM                 |               |                  |  |  |                         | Schimel     |                             |  |  |
| 8 | 1 | 0.1 | 0.6 |   |   |   |   |                     |               |                  |  |  |                         |             |                             |  |  |
| 1 | 2 | 0.1 | 0.6 |   |   |   |   |                     | Mild RP       |                  |  |  |                         | Carmel      |                             |  |  |
| 9 | 2 | 0.1 | 0.6 |   |   |   |   |                     |               |                  |  |  |                         |             |                             |  |  |
| 2 | 2 | 0.2 | 0.6 |   | * |   | * |                     |               |                  |  |  | Wandering eye movements | Robb        |                             |  |  |
| 0 | 2 | 0.2 | 0.6 |   |   |   |   |                     |               |                  |  |  |                         |             |                             |  |  |
| 1 | 2 | 0.2 | 0.6 |   |   |   |   | Mild BEM            |               | 77*/96**         |  |  |                         | Bartholomew | c.271dupA/271dupA           |  |  |
| 2 | 3 | 0.3 | 0.7 |   |   |   |   | Degeneration        |               |                  |  |  |                         | Smith       |                             |  |  |
| 2 | 3 | 0.7 | 0.7 |   |   |   |   | Maculopathy         |               | 42§              |  |  |                         | Tsina       | c.271dupA/271dupA           |  |  |
| 3 | 2 | 0.1 | 0.8 |   |   |   |   |                     |               |                  |  |  |                         | Gerth       | c.547_548delGT/547_548delGT |  |  |
| 1 | 2 | 0.1 | 0.9 |   |   |   |   |                     |               |                  |  |  |                         | Traboulsi   | *improvement                |  |  |
| 2 | 3 | 0.1 | 1   |   | * |   |   | Atrophy             |               | Normal           |  |  |                         | Patton      |                             |  |  |
| 2 | 3 | 0.1 | 1   |   |   |   |   |                     | RP            |                  |  |  |                         | Ellaway     | c.271dupA/271dupA           |  |  |
| 4 | 3 | 0.1 | 1   |   |   |   |   |                     |               |                  |  |  |                         |             |                             |  |  |
| 9 | 3 | 0.1 | 1   |   |   |   |   | BEM                 | Peripheral RP |                  |  |  |                         | Mitchell    | c.331C>T/271dupA            |  |  |
| 2 | 2 | 0.2 | 1   |   |   |   |   | Foveal pigmentation |               |                  |  |  |                         | Robb        |                             |  |  |
| 0 | 2 | 0.5 | 1   |   | * |   | * |                     |               |                  |  |  |                         |             |                             |  |  |
| 2 | 1 | 0.5 | 1   |   |   |   |   |                     |               |                  |  |  |                         | Enns        | c.331C>T/615C>G             |  |  |
| 4 | 3 | 0.1 | 1   |   |   |   |   |                     | RP            |                  |  |  |                         | Geraghty    | c.271dupA/271dupA           |  |  |
| 9 | 3 | 0.1 | 1.3 |   |   |   |   |                     |               | Cone dysfunction |  |  |                         | Mitchell    | c.331C>T/271dupA            |  |  |
| 1 | 3 | 0.2 | 1.3 |   |   |   |   |                     | RP            |                  |  |  |                         | Bartholomew | c.271dupA/271dupA           |  |  |
| 2 | 2 | 0.1 | 1   |   | * |   |   | Progressive         |               | 50*/62**/        |  |  |                         | Robb        |                             |  |  |

|                   |   |    |    |   |   |  |                 |                             |        |                              |                 |      |      |             |  |  |                             |
|-------------------|---|----|----|---|---|--|-----------------|-----------------------------|--------|------------------------------|-----------------|------|------|-------------|--|--|-----------------------------|
| 0                 |   | 2  | 6  |   |   |  |                 | 150***                      |        |                              |                 |      |      |             |  |  |                             |
| 25                | 3 | 05 | 17 |   |   |  |                 | RP                          |        | Sclerotic retinal arterioles |                 |      |      | Enns        |  |  | c.331C>T/615C>G             |
| 21                | 3 | 03 | 17 |   |   |  | Atrophy         |                             |        |                              |                 |      |      | Smith       |  |  |                             |
| 20                | 3 | 02 | 17 |   |   |  |                 | RP posterior pole           |        |                              |                 |      |      | Robb        |  |  |                             |
| 22                | 3 | 07 | 18 |   |   |  |                 |                             | 40§    |                              |                 |      |      | Tsina       |  |  | c.271dupA/271dupA           |
| 18                | 3 | 01 | 2  |   |   |  | Progression BEM |                             |        |                              |                 |      |      | Schimel     |  |  |                             |
| 20                | 4 | 02 | 27 | * | * |  | Pale            | Progressive RP              |        |                              |                 | 1    | 1    | Robb        |  |  |                             |
| 22                | 3 | 07 | 28 |   |   |  |                 |                             | 30§    |                              |                 |      |      | Tsina       |  |  | c.271dupA/271dupA           |
| 21                | 4 | 03 | 3  |   |   |  |                 |                             |        |                              |                 | LB   | LB   | Smith       |  |  |                             |
| 15                | 3 | P  | 3  |   |   |  | Pale            |                             |        |                              |                 | 0.9  | 0.9  | Patton      |  |  |                             |
| 26                | 3 | 05 | 3  |   |   |  | Pale            |                             |        |                              |                 |      |      | Patton      |  |  |                             |
| 10                | 3 | 02 | 3  |   |   |  | BEM             | Pale                        |        |                              |                 | 0.78 | 0.78 | Bartholomew |  |  | c.271dupA/271dupA           |
| 13                | 2 | 01 | 35 |   |   |  |                 |                             |        | Retinal nerve fiber loss     |                 | 0.2  | 0.2  | Gerth       |  |  | c.331C>T/666C>A             |
| 3                 | 3 | 01 | 37 |   |   |  | Atrophy         |                             |        |                              | Progressive CRD | 0.5  | 0.5  | Gerth       |  |  | c.547_548delGT/547_548delGT |
| 22                | 2 | 07 | 39 |   |   |  |                 |                             | 100§   |                              |                 |      |      | Tsina       |  |  | *Improved with therapy      |
| 27                | 3 | 01 | 39 |   | * |  | Maculopathy     | Atrophy                     |        |                              |                 |      |      | Gerth       |  |  | c.547_548delGT/547_548delGT |
| 12                | 4 | 03 | 45 |   |   |  |                 | RP                          |        |                              |                 | LB   | LB   | Beauchamp   |  |  |                             |
| 10                | 4 | 02 | 5  |   |   |  | Pale            | Diffuse RP                  |        |                              |                 | 1    | 0.9  | Bartholomew |  |  | c.271dupA/271dupA           |
| 23                | 4 | 01 | 8  |   |   |  |                 |                             |        |                              |                 | 1    | 0.8  | Patton      |  |  |                             |
| 18                | 4 | 01 | 10 |   |   |  |                 |                             |        |                              |                 | 1    | 1    | Schimel     |  |  |                             |
| 27                | 3 | 01 | 13 |   |   |  | Maculopathy     | Atrophy                     | RP     |                              | RCD             |      |      | Gerth       |  |  | c.547_548delGT/547_548delGT |
| <b>LATE-ONSET</b> |   |    |    |   |   |  |                 |                             |        |                              |                 |      |      |             |  |  |                             |
| 28                | 2 | 4  | 4  | * |   |  |                 | Discrete pigmentary changes | Normal |                              |                 |      |      | Van Hove    |  |  | c.82-9_12delTTTC/271dupA    |

|    |   |   |     |   |  |  |                             |  |  |      |      |          |                          |
|----|---|---|-----|---|--|--|-----------------------------|--|--|------|------|----------|--------------------------|
| 29 | 1 | 6 | 6   | * |  |  |                             |  |  | 0.1  | 0.1  | Gerth    | c.394C>T/394C>T          |
| 30 | 1 | 6 | 7.2 | * |  |  |                             |  |  |      |      | Gerth    | c.3G>A/3G>A              |
| 31 | 2 | 1 | 1   | * |  |  | Discrete pigmentary changes |  |  |      |      | Van Hove | c.82-9_12delTTTC/271dupA |
| 32 | 1 | 1 | 1   | * |  |  |                             |  |  |      |      | Gerth    | c.394C>T394C>T           |
| 33 | 2 | 1 | 1   |   |  |  | Mild pallor                 |  |  |      |      | Shinnar  | c.394C>T394C>T           |
| 34 | 1 | 6 | 6   | * |  |  |                             |  |  |      |      | Roze     | c.271dupA/347T>C         |
| 35 | 1 | 2 | 2   |   |  |  |                             |  |  |      |      | Bodamer  | c.271dupA/482G>A         |
| 29 | 1 | 6 | 5   | * |  |  |                             |  |  | 0.02 | 0.04 | Gerth    | c.394C>T/394C>T          |
| 30 | 1 | 6 | 9   | * |  |  |                             |  |  | 0    | 0.2  | Gerth    | c.3G>A/3G>A              |
| 30 | 2 |   | 2   | * |  |  |                             |  |  |      | 0.32 | Gerth    | c.3G>A/3G>A              |

\*Flicker (cones) Normal: 60-100 uV; \*\*Cones % of normal (80 uV); \*\*\*Scotopic (rods) 300-400 uV; § Rod % normal (300) b wave (postreceptor)  
 MP: Macular pigmentation; BEM: Bull's eye maculopathy; ERG: electroretinogram; OP: Optic pallor; RP: Retinitis pigmentosa; VF: Visual fixation

Type of file: table

Label: 2

Filename: 315374\_Table2.doc

**Supplementary Table 2. Outcome of patients with cbIC disease and their therapeutic regimens.**

| Classification | Age (years) | Cbl form/<br>frequency /<br>Dose 1 mg/day<br>unless specified<br>(Age modified) | Other<br>Medications<br>(Age added)                                      | Developmental<br>delay | Neurologic<br>complications                                                      | Death (age) | Other                                                                          | Reference             | Genotype                           |
|----------------|-------------|---------------------------------------------------------------------------------|--------------------------------------------------------------------------|------------------------|----------------------------------------------------------------------------------|-------------|--------------------------------------------------------------------------------|-----------------------|------------------------------------|
| 5              | 0.1         | CNCbl                                                                           |                                                                          |                        |                                                                                  | 7 weeks     | ? HUS                                                                          | Mudd                  | NR                                 |
| 5              | 0.3         | CNCbl                                                                           |                                                                          |                        | White matter<br>disease                                                          | 4 months    | Diffuse pulmonary<br>thromboembolism                                           | Brandstetter          | c.271dupA/331C>T                   |
| 4              | 0.1         | CNCbl II                                                                        |                                                                          |                        |                                                                                  |             | HUS, required<br>ventilation,<br>transfusions                                  | Sharma                | c.271dupA/271dupA                  |
| 2              | 0.1         | OHCbl daily                                                                     |                                                                          |                        |                                                                                  |             | Resolution HUS                                                                 | Same patient as above |                                    |
| 3              | 5           | OHCbl 5X/week                                                                   |                                                                          | Delay                  | Diffuse white<br>matter disease                                                  |             | No recurrence                                                                  | Same patient as above |                                    |
| 2              | 0.1         | OHCbl daily II                                                                  | Betaine,<br>folic,<br>carnitine                                          |                        |                                                                                  |             | Daily OHCbl:<br>resolution seizures,<br>successful VSD<br>repair               | Tomaske               | NR                                 |
| 3              | 1           | OHCbl 2X/week                                                                   | Betaine,<br>folic                                                        | Mild                   | Hypotonia,<br>cortical atrophy                                                   |             |                                                                                | Same patient as above |                                    |
| 2              | 0.3         | OHCbl daily                                                                     | Betaine,<br>folinic,<br>carnitine                                        |                        | Regained<br>consciousness,<br>seizures<br>controlled,<br>improved<br>muscle tone |             |                                                                                | Harding               | c.328_331delAAC/<br>328_331delAACC |
| 2              | 0.2         | OHCbl daily II                                                                  | Betaine                                                                  |                        | Neurological<br>improvement                                                      |             | Resolution<br>microangiopathic<br>hemolysis                                    | Francis               | c.457C>T/481C>T                    |
| 3              | 0.5         | OHCbl 2/week                                                                    | Betaine,<br>folic,<br>carnitine,<br>protein<br>restriction 2<br>g/kg/day | Normal<br>motor        |                                                                                  |             | Resolution<br>cardiomyopathy;<br>Growth 3 <sup>rd</sup> centile<br>at 7 months | DeBie                 | c.271dupA/271dupA                  |
| 2              | 0.5         | OHCbl 1/day                                                                     | Carnitine,<br>folinic                                                    | Motor<br>delay         |                                                                                  |             | Resolution HUS                                                                 | Kind                  | NR                                 |
| 2              | 1.2         | OHCbl daily                                                                     | Carnitine.<br>Betaine<br>added late                                      | Delay                  | Hypotonia                                                                        |             | Normal growth<br>Tracks but<br>nystagmus with                                  | Urbon                 | NR                                 |



|   |      |                                                                                     |                                                                            |       |                                                                                 |          |                                                                                                |                       |                   |
|---|------|-------------------------------------------------------------------------------------|----------------------------------------------------------------------------|-------|---------------------------------------------------------------------------------|----------|------------------------------------------------------------------------------------------------|-----------------------|-------------------|
| 1 | 0.75 | OhCbl 4/week<br>Started prenatally                                                  | Betaine,<br>folic                                                          | None  |                                                                                 |          | fixation<br>No complications                                                                   | Spada                 | NR                |
| 2 | 0.2  | OHCbl daily $\square$                                                               |                                                                            |       | Considerable<br>neurologic<br>improvement                                       |          | Improvement<br>marrow<br>megaloblastic<br>changes                                              | Carmel                | NR                |
| 4 | 0.6  | OHCbl 3X every<br>2 weeks                                                           |                                                                            |       | Seizures                                                                        |          | Neutrophil<br>hypersegmentation                                                                | Same patient as above |                   |
| 2 | 0.15 | OHCbl IV daily $\square$                                                            |                                                                            |       |                                                                                 |          | Dramatic clinical<br>improvement                                                               | Ribes                 | NR                |
| 3 | 3.6  | At 8 months of<br>age $\square$ followed<br>by trials MeCbl<br>oral OHCbl $\square$ | Folic acid,<br>protein<br>restriction,<br>Betaine<br>added at<br>20 months | IQ 65 | Infrequent<br>seizures,<br>microcephaly                                         |          | Failure to thrive                                                                              | Same as above         |                   |
| 5 | 0.6  | Oral OHCbl                                                                          | Betaine                                                                    |       | Progressive<br>impairment                                                       | 1 year   |                                                                                                | Frattini              | c.271dupA/616C>T  |
| 4 | 3    | OHCbl<br>NON-<br>COMPLIANCE                                                         | Betaine                                                                    |       |                                                                                 |          | cor pulmonale                                                                                  | Profitlich            | NR                |
| 5 | 3    | OHCbl 1/week $\square$<br>MeCbl $\square$ CNCbl<br>$\square$ No compliance          | Betaine,<br>methionine                                                     |       | Seizures, white<br>matter disease,<br>severe<br>demyelinating<br>polyneuropathy | 15 years |                                                                                                | Smith                 | NR                |
| 2 | 0.4  | Prenatal<br>OHCbl 3-5/week                                                          | Betaine                                                                    |       |                                                                                 |          | Foveal<br>hyperpigmentation                                                                    | Huemer                | NR                |
| 4 | 2    | OHCbl 0.5 mg<br>3/week $\square$ daily<br>at 17 months                              | Protein<br>restriction.<br>added<br>betaine at<br>15 months                |       | Choreoatetosis<br>Grey and white<br>matter disease                              |          | Initial resolution<br>hematological<br>abnormalities and<br>improvement<br>neurological status | Enns                  | c.331C>T/615C>G   |
| 3 | 1    | OHCbl 0.5 mg<br>daily $\square$ 0.75 mg<br>3X/week                                  | Betaine,<br>folinic                                                        | Delay |                                                                                 |          | Pigmentary<br>retinopathy                                                                      | Ellaway               | c.271dupA/271dupA |
| 3 | 1.25 | OHCbl daily                                                                         | Betaine,<br>folic acid                                                     | DQ 80 |                                                                                 |          | Retinopathy<br>Normal growth                                                                   | Bartholomew           | c.271dupA/271dupA |
| 3 | 4.4  | OHCbl daily                                                                         | Betaine,<br>folic acid                                                     | IQ 77 |                                                                                 |          | Retinopathy<br>Growth <5 <sup>th</sup> centile                                                 | Bartholomew           | c.271dupA/271dupA |
| 3 | 0.9  | OHCbl 2/week                                                                        |                                                                            |       |                                                                                 |          | Pigmentary<br>retinopathy                                                                      | Robb                  | NR                |

| Classification | Age (years) | Cbl form/<br>frequency /<br>Dose 1 mg/day<br>unless specified<br>(Age modified) | Other<br>Medications                         | Cognitive            | Neurologic<br>complications                                                 | Death (age) | Other                                                        | Reference             | Genotype                     |
|----------------|-------------|---------------------------------------------------------------------------------|----------------------------------------------|----------------------|-----------------------------------------------------------------------------|-------------|--------------------------------------------------------------|-----------------------|------------------------------|
| 1              | 11          | OHCbl IM 1<br>mg/day                                                            | Folic acid,<br>betaine (1<br>month<br>later) | Back to<br>normal    | Resolution<br>EEG findings<br>and behavioral<br>changes                     |             | When weaned to<br>OHCbl 4/week -<br>worsened<br>considerably | Augoustides           | c.271dupA/394C>T             |
| 5              | 13          | None                                                                            |                                              |                      |                                                                             | 13 years    | Sister of the above                                          | Augoustides           | c.271dupA/394C>T             |
| 1              | 12          | OHCbl SQ 5<br>mg/day                                                            | Betaine                                      |                      |                                                                             |             | Resolution<br>thrombotic<br>microangiopathy.                 | Van Hove              | c.82-9_12delTTTC/<br>271dupA |
| 1              | 4           | OHCbl SQ 5<br>mg/day                                                            | Betaine                                      |                      |                                                                             |             | Resolution<br>thrombotic<br>microangiopathy.                 | Van Hove              | c.82-9_12delTTTC/<br>271dupA |
| 5              | 16          | OHCbl ORAL                                                                      | Betaine,<br>methionine                       |                      |                                                                             | 21 years    | Cerebrovascular<br>complications                             | Brunelli              | NR                           |
| 2              | 16          | OHCbl IV 2 Π                                                                    | Betaine,<br>folinic,<br>carnitine            |                      | Recovery of<br>strength and<br>resolution of<br>psychotic<br>symptoms       |             |                                                              | Roze                  | c.271dupA/T347C              |
| 4              | 20          | OHCbl 2<br>mg/month                                                             | Betaine,<br>folinic,<br>carnitine            |                      | Severe<br>myelopathy,<br>neuropathy                                         |             | Deep venous<br>thrombosis                                    | Same patient as above |                              |
| 3              | 24          | OHCbl IM 1<br>mg/day                                                            | Betaine,<br>folinic,<br>carnitine            |                      | Proximal<br>weakness, mild<br>improvement in<br>gait                        |             | Mild improvement                                             | Roze                  | c.271dupA/T347C              |
| 2              | 42          | OHCbl IM 2 mg<br>3X/week                                                        | Betaine,<br>folate,<br>carnitine             |                      | Seizure-free,<br>better work<br>performance<br>and executive<br>functioning |             |                                                              | Boxer                 | c.394C>T/394C>T              |
| 2              | 42          | OHCbl IM daily                                                                  | Betaine,<br>folinic                          | Complete<br>recovery | Recovered<br>partial<br>autonomy and<br>ability to walk                     |             | Disappearance<br>psychiatric<br>symptoms                     | Thauvin-<br>Robinet   | c.271dupA/565C>A             |
| 1              | 40          | OHCbl IM daily                                                                  | Betaine,<br>folinic                          |                      |                                                                             |             | No recurrence<br>thromboembolic                              | Thauvin-<br>Robinet   | c.271dupA/365A>G             |
